# Supplementary material
Source: MDPI journal article supplement (https://www.mdpi.com/2073-4344/9/4/305)
Supplement: s1 [file s1]

# A Photo-enzymatic cascade to transform racemic alcohols into enantiomerically pure amines

Jenő Gacs, Wuyuan Zhang, Tanja Knaus, Francesco G. Mutti, Isabel W.C.E. Arends, Frank Hollmann\*

## Experimental section

### Materials

Unless stated otherwise, the used chemicals were bought from Sigma Aldrich, Alfa Aesar, Fluka and used as received. The  $\omega$ -transaminases were prepared by Tanja Knaus and Francesco Mutti and applied as received.

### Expression of $\omega$ -transaminases

*E. coli* BL21 DE3 strain was used for the expression of *At* $\omega$ TA ( $\omega$ TA from *Aspergillus terreus*, in pET21a, C-term His6-tag), *Bm* $\omega$ TA ( $\omega$ TA from *Bacillus megaterium* SC6394, pET28b, N-term His6-tag), *Cv* $\omega$ TA ( $\omega$ TA from *Chromobacterium violaceum* DSM 30191, pET28b, N-term His6-tag), *Pf* $\omega$ TA ( $\omega$ TA from *Pseudomonas fluorescens*, pET21a, no tag) and *Vf* $\omega$ TA ( $\omega$ TA from *Vibrio fluvialis*, pET28b,

N-term His6-tag). 800 mL of LB medium supplemented with the appropriate antibiotic (100  $\mu$ g/mL ampicillin for pET21a and 50  $\mu$ g/mL kanamycin for pET28b) were inoculated with 15 mL of an overnight culture harboring the desired vector with genes for the expression of the  $\omega$ TAs. Cells were grown at 37 °C until an OD<sub>600</sub> of 0.6-0.8 was reached and expression of proteins was induced by the addition of IPTG (0.5 mM). Cells were grown overnight at 25 °C and harvested by centrifugation (4 °C, 4500 rpm and 15 min). The pellets were resuspended in phosphate buffer (100 mM, pH 7.0) containing 0.5 mM PLP and lyophilized.

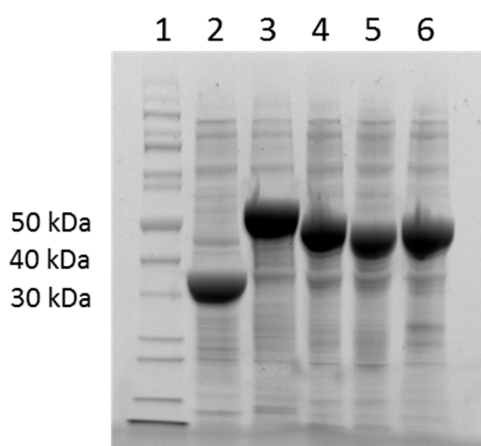

**Figure S1:** SDS-Page for the expression of the  $\omega$ TAs. Lane 1: PageRuler™ Unstained Protein Ladder (ThermoFisher Scientific); lane 2: At- $\omega$ TA; lane 3: Bm- $\omega$ TA; lane 4: Cv- $\omega$ TA; lane 5: Pf- $\omega$ TA, lane 6: Vf $\omega$ TA

## Measurements

### Gas chromatography (GC)

The used systems are summarized in Table 1. The details of the analysis are summarized in the Analytics chapter.

**Table S1:** Used GC systems.

| # | Machine               | Column                                                               | Detector | Carrier gas    |
|---|-----------------------|----------------------------------------------------------------------|----------|----------------|
| 1 | Shimadzu GC-2010 Plus | CP Wax 52CB (25 m $\times$ 0.25 mm $\times$ 1.2 $\mu$ m)             | FID      | N <sub>2</sub> |
| 2 | Shimadzu GC-2010 Plus | HYDRODEX $\beta$ TBDAC (50 m $\times$ 0.25 mm $\times$ 0.25 $\mu$ m) | FID      | H <sub>2</sub> |
| 3 | Shimadzu GC-2010      | LIPODEX E (50 m $\times$ 0.25 mm $\times$ 0.25 $\mu$ m)              | FID      | H <sub>2</sub> |
| 4 | Shimadzu GC-2014      | CP Sil 5 CB (50 m $\times$ 0.53 mm $\times$ 1.0 $\mu$ m)             | FID      | N <sub>2</sub> |

|   |                           |                                           |     |                |
|---|---------------------------|-------------------------------------------|-----|----------------|
| 5 | Shimadzu GC-<br>2010 Plus | Chirasil Dex CB (25 m × 0.32 mm × 0.25 μm | FID | H <sub>2</sub> |
|---|---------------------------|-------------------------------------------|-----|----------------|

---

## Photocatalyst synthesis and characterization

### Sodium anthraquinone-2-sulfonate (SAS)

SAS was bought from Sigma Aldrich ( $\geq 98\%$  by HPLC) and used as received.

#### FT-IR spectrum

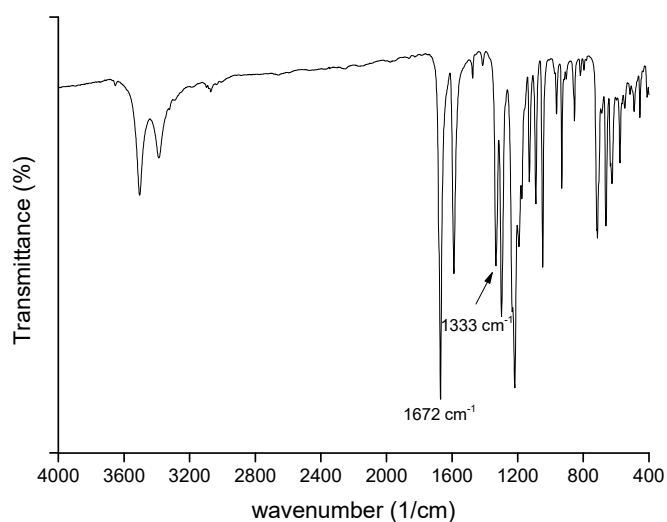

**Figure S2:** FT-IR spectrum of SAS. The characteristic stretching peaks of the ketone groups ( $1672\text{ cm}^{-1}$ ) and the sulfonate group ( $1333\text{ cm}^{-1}$ ) are visible.

### Graphitic carbon nitride ( $\text{g-C}_3\text{N}_4$ )

#### Synthesis

10 g of urea (Riedel –de Haen; 99 %) was weighed into a ceramic crucible and covered with another one. The system was heated in a furnace (Carbolite CWF 1200 with a Eurotherm 2416 CG PID controller) according to the following program: from room temperature samples were heated up with  $5\text{ }^\circ\text{C/min}$  to  $550\text{ }^\circ\text{C}$  and kept at temperature for 4 h. Samples were cooled down with  $10\text{ }^\circ\text{C/min}$  to room temperature.

### FT-IR spectrum

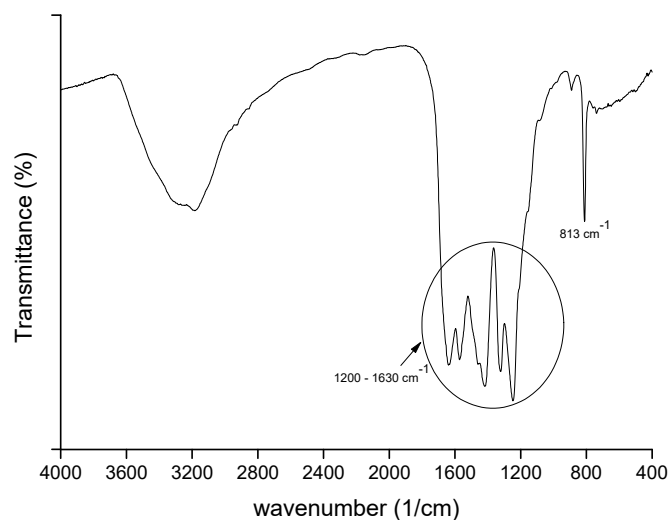

**Figure S3:** FT-IR spectrum of g-C<sub>3</sub>N<sub>4</sub>. The peak at 813 cm<sup>-1</sup> is characteristic to the stretching mode of the s-triazine ring, while the peaks between 1200 and 1630 cm<sup>-1</sup> are assigned to the stretching vibration modes of the C-N and C=N heterocycles [1].

### XRD spectrum

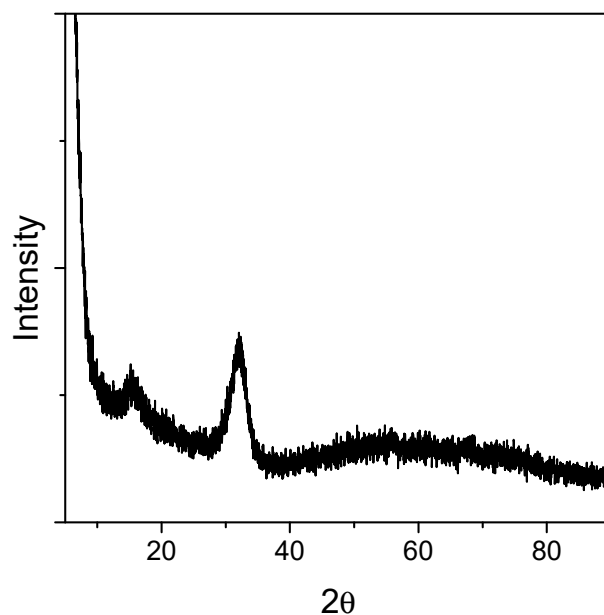

**Figure S4:** XRD spectrum of g-C<sub>3</sub>N<sub>4</sub>. The characteristic peak is visible at  $2\theta = 32$ . Please note that there is a shift in the spectrum compared to the literature due to the used Co K $\alpha$  radiation (1.789 Å) source [2] [1].



## Graphitic carbon nitride doped with vanadium oxide (g-C<sub>3</sub>N<sub>4</sub>-VO)

### Synthesis

10 g of urea (Riedel –de Haen; 99 %) was weighed into a ceramic crucible and covered with another one. The system was heated in a furnace (Carbolite CWF 1200 with a Eurotherm 2416 CG PID controller) according to the following program: from room temperature samples were heated up with 5 °C/min to 550 °C and kept at temperature for 4 h. Samples were cooled down with 10 °C/min to room temperature. Next, 0.1 g of the formed g-C<sub>3</sub>N<sub>4</sub> was dispersed in 10 ml 50 % methanol-water mixture with 0.053 g (0.2 mmol) vanadyl(IV)acetylacetonate (Acros organics; >99 %). The system was stirred on a magnetic stirrer for 4 h. Eventually, the mixture was centrifuged and washed with 2\*10 ml methanol. The sample was dried at 70 °C overnight.

### FT-IR spectrum

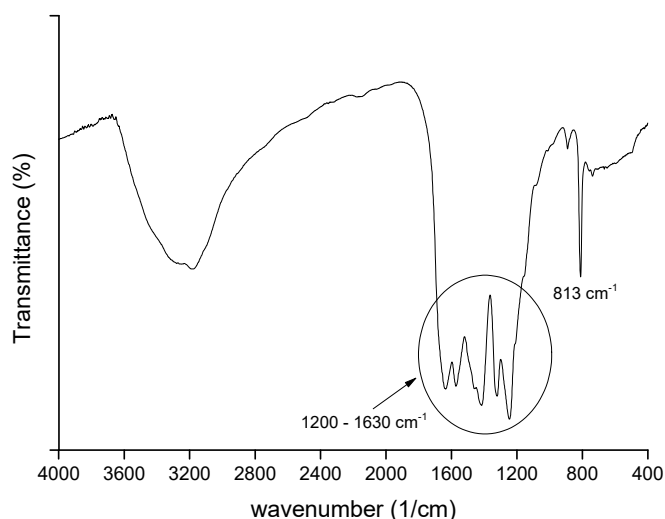

**Figure S5:** FT-IR spectrum of g-C<sub>3</sub>N<sub>4</sub>. The peaks at 813 cm<sup>-1</sup> is characteristic to the stretching mode of the s-triazine ring, while the peaks between 1200 and 1630 cm<sup>-1</sup> are characteristic to the stretching vibration modes of the C-N and C=N heterocycles [1].

## XRD spectrum

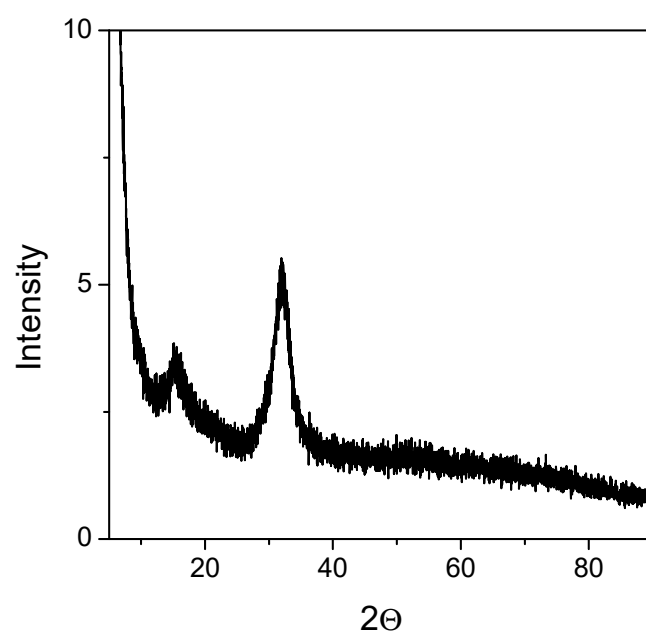

**Figure S6:** XRD spectrum of g-C<sub>3</sub>N<sub>4</sub>-VO. The characteristic peak is visible at  $2\Theta = 32$ . Please note that there is a shift in the spectrum compared to the literature due to the used Co K $\alpha$  radiation (1.789 Å) source [3].

## Control reactions

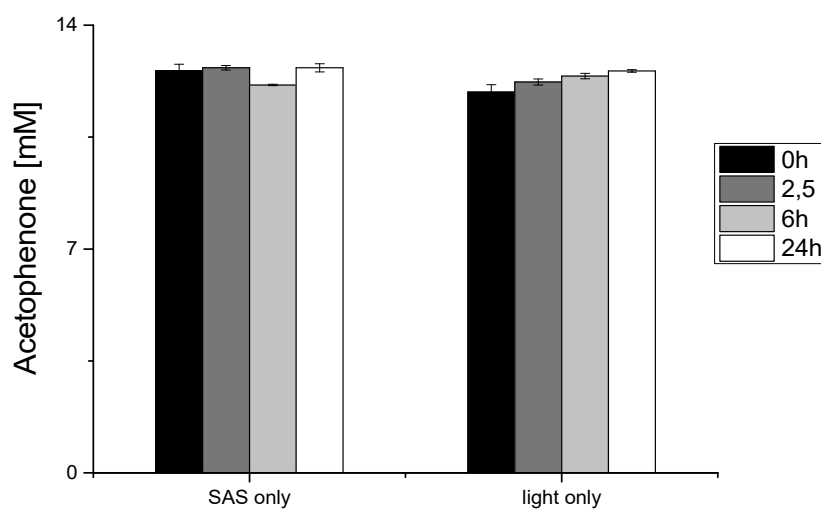

**Figure S7:** Effect of evaporation on the acetophenone concentration during the photo-oxidation of 1-phenylethanol. Reaction conditions: 1 ml MilliQ water with [Acetophenone] = 11 mM and [SAS] = 1.5 mM. Both reactions were incubated at 30 °C.

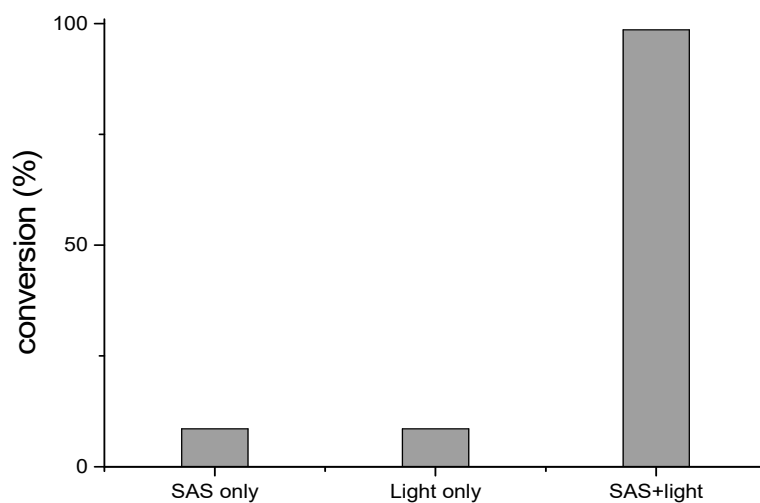

**Figure S8:** Control reaction of the photooxidation. Reaction conditions: 1 ml MilliQ water with [1-phenylethanol] = 15 mM, [SAS] = 1.5 mM. Reactions were incubated at 30 °C, irradiated with white light ( $\lambda > 400$  nm) and stirred gently with a magnetic stirrer.

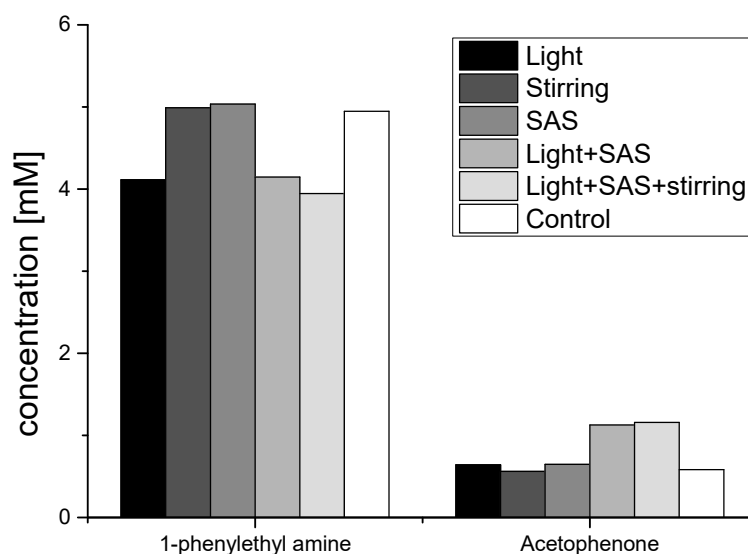

**Figure S9:** Effect of the circumstances of the photooxidation on the efficiency of the reductive amination. Reaction conditions: 1 ml pH 9 reaction mixture containing [NaPI] = 100 mM, [acetophenone] = 6 mM [SAS] = 0.75 mM, [IPRA] = 1 M, [PLP] = 1 mM, [crude cell extract overexpressed with *BM $\omega$ TA* enzyme] = 10 mg/ml. Samples were incubated at 30°C, irradiated with white light ( $\lambda > 400$  nm) and stirred gently with a magnetic stirrer.

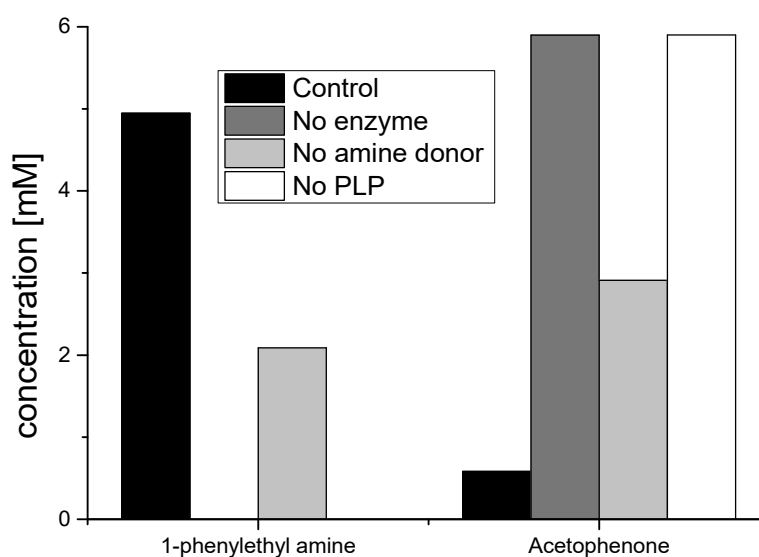

**Figure S10:** Control reaction of the reductive amination. Reaction conditions: 1 ml pH 9 reaction mixture containing [NaPI] = 100 mM, [acetophenone] = 6 mM, [SAS] = 0.75 mM, [IPRA] = 1 M, [PLP] = 1 mM, [crude cell extract overexpressed with *BM $\omega$ TA* enzyme] = 10 mg/ml. Samples were incubated at 30°C and shaken on a thermal shaker.

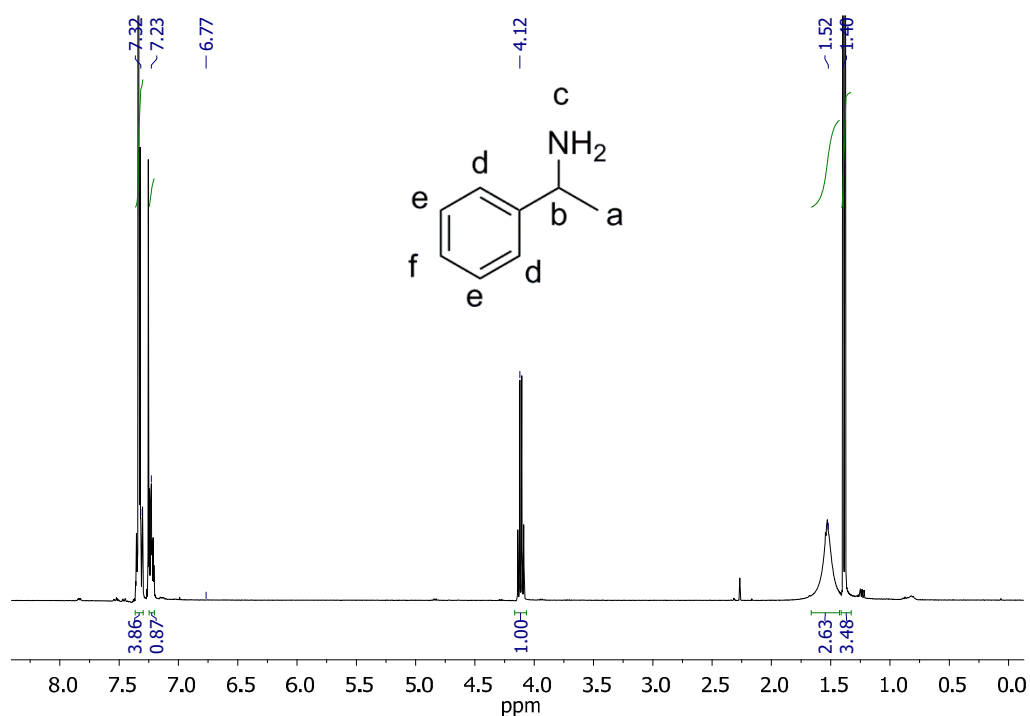

**Figure S11:** <sup>1</sup>H NMR spectrum of 1-phenylethylamine. Protons: a = 1.16 ppm; b = 4.12 ppm; d & e = 7.32 ppm, f = 7.23 ppm. Deuterated CH<sub>2</sub>Cl<sub>2</sub> was used as a solvent.

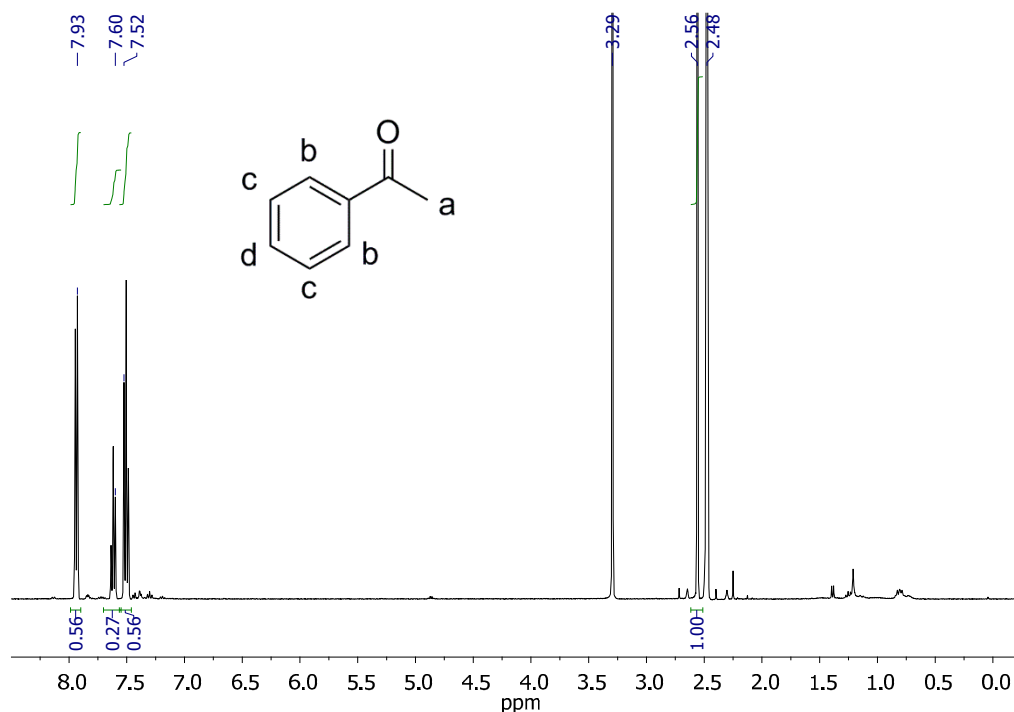

**Figure S12:** <sup>1</sup>H NMR spectrum of oxidation of 1-phenylethylamine. Protons: a = 2.48 ppm; b = 7.93 ppm; c = 7.52 ppm; d = 7.60 ppm. Deuterated DMSO was used as a solvent. Reaction conditions: 1 ml MilliQ water with [1-Phenylethylamine] = 15 mM, [SAS] = 1.5 mM. The reaction was incubated at 30 °C, irradiated with white light ( $\lambda > 400$  nm) and stirred gently with a magnetic stirrer.

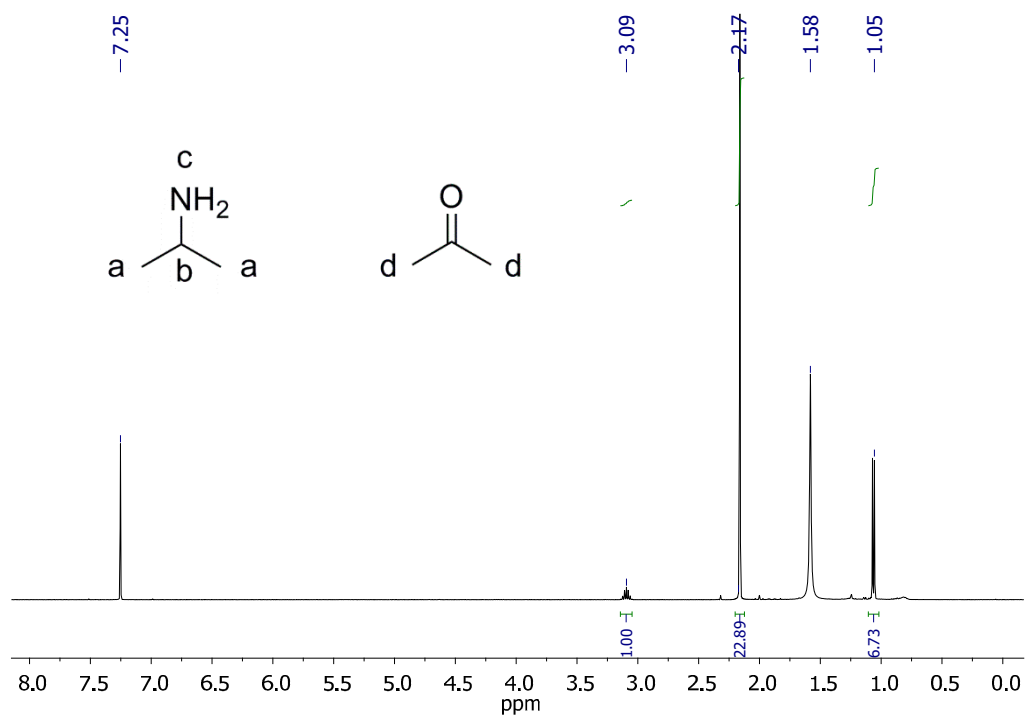

**Figure S13:**  $^1\text{H}$  NMR spectrum of oxidation of isopropylamine. Protons: a = 1.05 ppm; b = 3.09 ppm; c = 1.58 ppm; d = 2.17 ppm. Reaction conditions: 1 ml reaction mixture containing [isopropylamine] = 1 M, [NaPI] = 100 mM and [SAS] = 1.5 mM. The reaction was incubated at 30 °C, irradiated with white light ( $\lambda > 400$  nm) and stirred gently with a magnetic stirrer.

## Optimization of the individual reaction steps

### Photooxidation

#### Sodium anthraquinone-2-sulfonate (SAS)

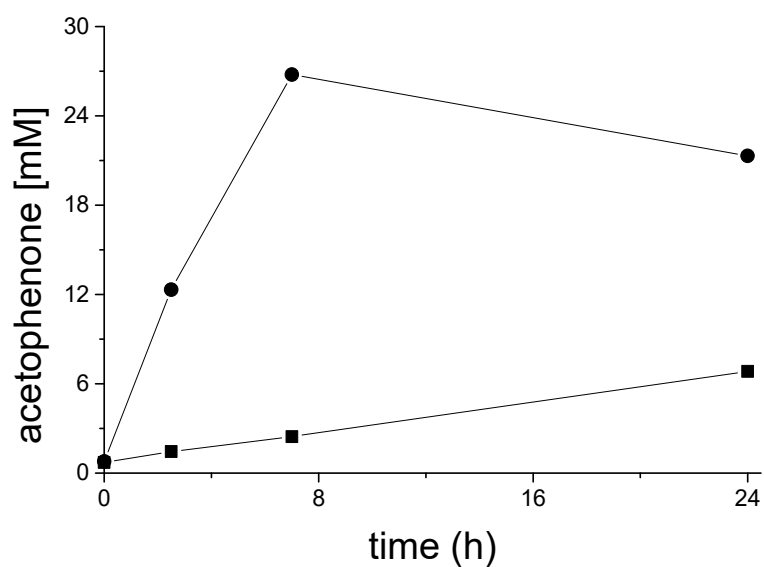

**Figure S14:** Effect of light intensity on the photocatalytic activity of SAS. Commercial white light bulb 205W (■) and white LED (●) were compared. Reaction conditions: 1 ml MilliQ water with [1-phenylethanol] = 25 mM and [SAS] = 1.5 mM. Reactions were run at 30 °C under atmospheric conditions and stirred with a magnetic stirrer.

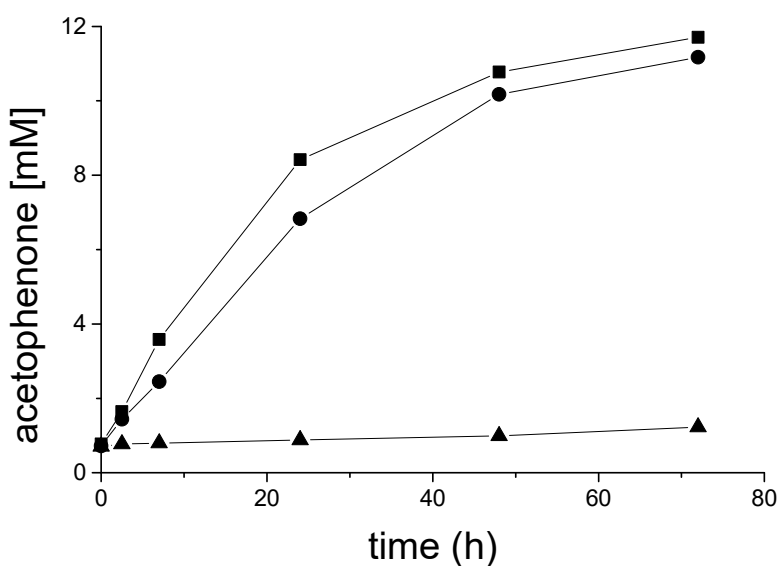

**Figure S5:** Effect of light composition on the photocatalytic activity of SAS. Blue LED (■), white LED (●) and red LED (▲) were investigated. Reaction conditions: 1 ml MilliQ water with [1-phenylethanol] = 25 mM and

[SAS] = 1.5 mM. Reactions were run at 30 °C under atmospheric conditions and stirred with a magnetic stirrer.

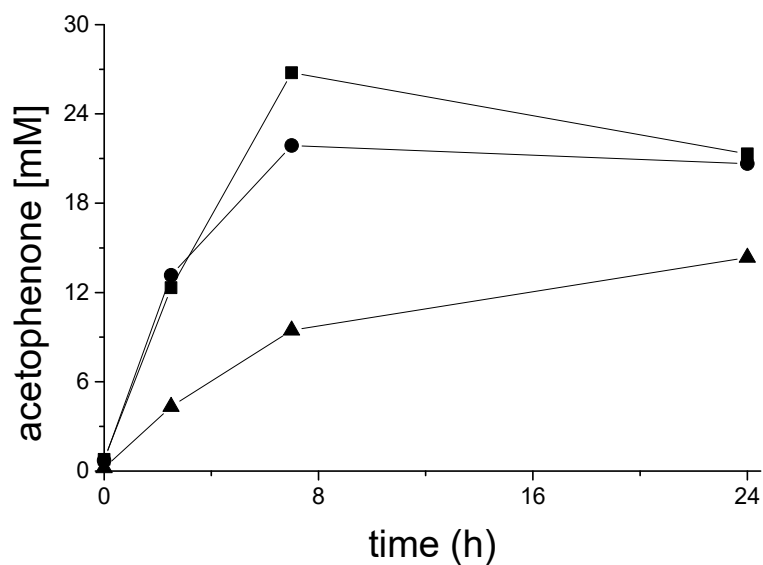

**Figure S16:** Effect of the reaction atmosphere on the photocatalytic activity of SAS. Air (■), oxygen (●) and nitrogen (▲) atmospheres were investigated. Reaction conditions: 1 ml MilliQ water with [1-phenylethanol] = 25 mM and [SAS] = 1.5 mM. Reactions were run at 30 °C and stirred with a magnetic stirrer.

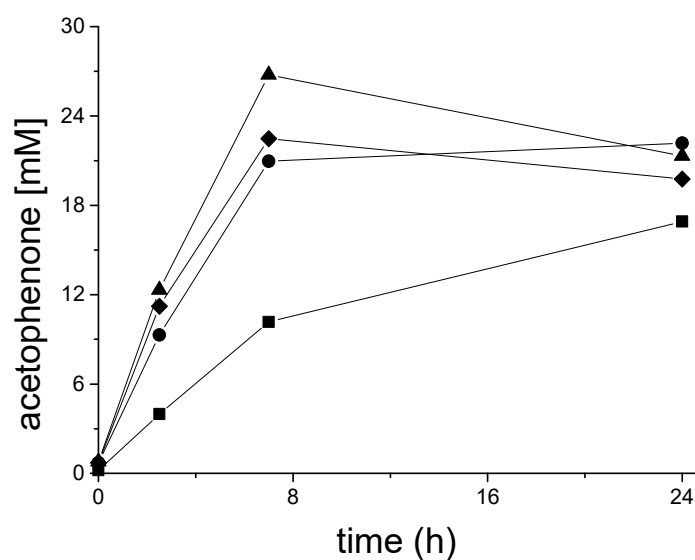

**Figure S17:** Effect of the amount of photocatalyst on the photocatalytic activity of SAS. 0.38 mM (■), 0.75 mM (●), 1.5 mM (▲) and 2.25 mM (◆) concentrations were investigated. Reaction conditions: 1 ml MilliQ water with [1-phenylethanol] = 25 mM. Reactions were run at 30 °C and stirred with a magnetic stirrer.

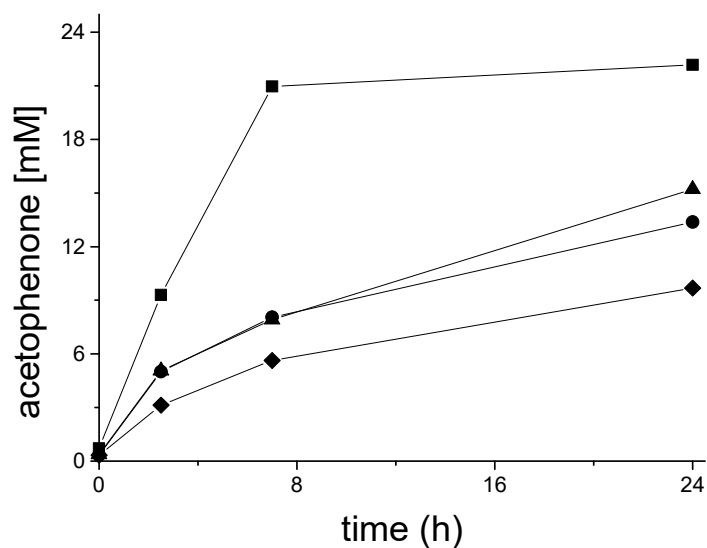

**Figure S18:** Effect of pH on the photocatalytic activity of SAS. pH 8.5 (●), pH 9.2 (▲), pH 10.2 (◆) and MilliQ water (■) were examined. Reaction conditions: MilliQ: 1 ml MilliQ water with [1-phenylethanol] = 25 mM and [SAS] = 1.5 mM. Varied pH: 1 ml reaction mixture containing [NaPI] = 100 mM, [isopropylamine] = 1 M, [1-phenylethanol] = 25 mM and [SAS] = 0.75 mM. Reactions were run at 30 °C and stirred with a magnetic stirrer.

### Graphitic carbon nitride

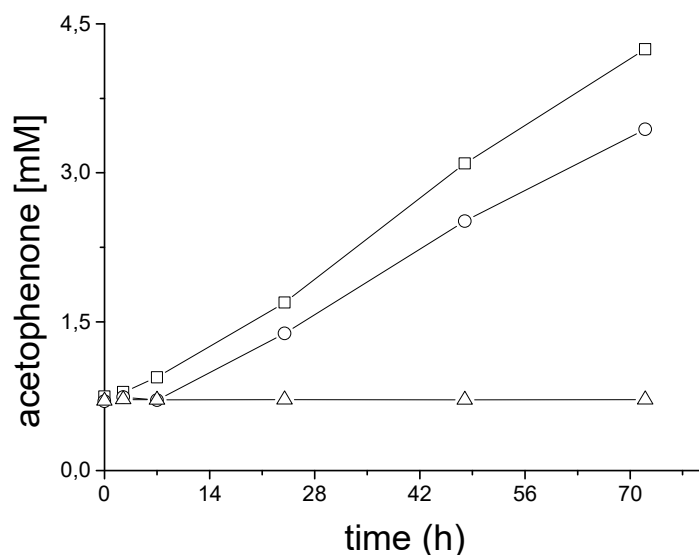

**Figure S19:** Effect of light composition on the photocatalytic activity of g-C<sub>3</sub>N<sub>4</sub>. Blue LED (□), white LED (○) and red LED (△) were investigated. Reaction conditions: 1 ml MilliQ water with [1-phenylethanol] = 25 mM and [g-C<sub>3</sub>N<sub>4</sub>] = 10 mg/ml. Reactions were run at 30 °C and stirred with a magnetic stirrer.

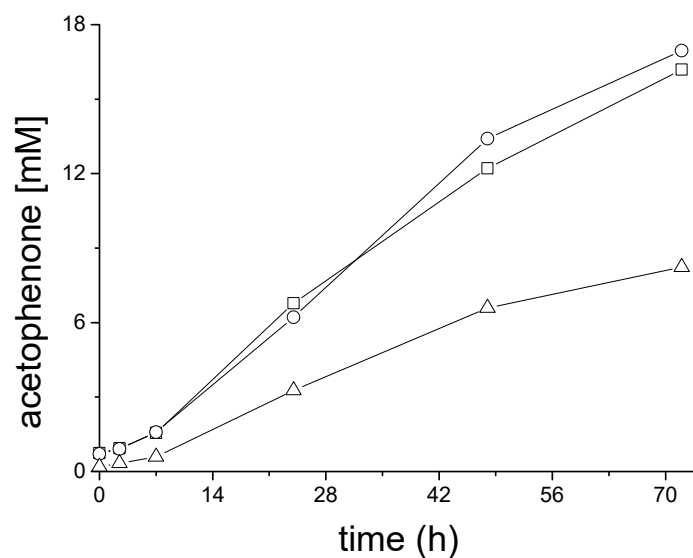

**Figure S20:** Effect of the reaction atmosphere on the photocatalytic activity of g-C<sub>3</sub>N<sub>4</sub>. Air (□), oxygen (○) and nitrogen (△) were investigated. Reaction conditions: 1 ml MilliQ water with [1-phenylethanol] = 25 mM and [g-C<sub>3</sub>N<sub>4</sub>] = 10 mg/ml. Reactions were run at 30 °C and stirred with a magnetic stirrer.

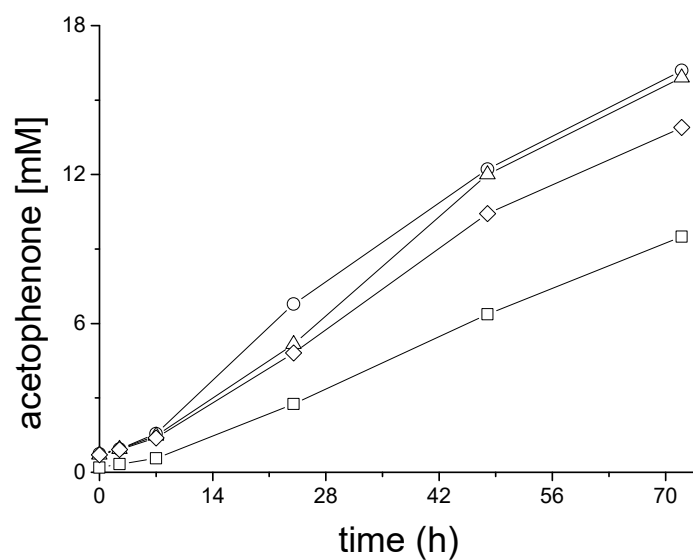

**Figure S21:** Effect of the photocatalyst amount on the photocatalytic activity of g-C<sub>3</sub>N<sub>4</sub>. 5 mg/ml (□), 10 mg/ml (○), 15 mg/ml (△) and 30 mg/ml (◇) concentrations were investigated. Reaction conditions: 1 ml MilliQ water with [1-phenylethanol] = 25 mM. Reactions were run at 30 °C under and stirred with a magnetic stirrer.

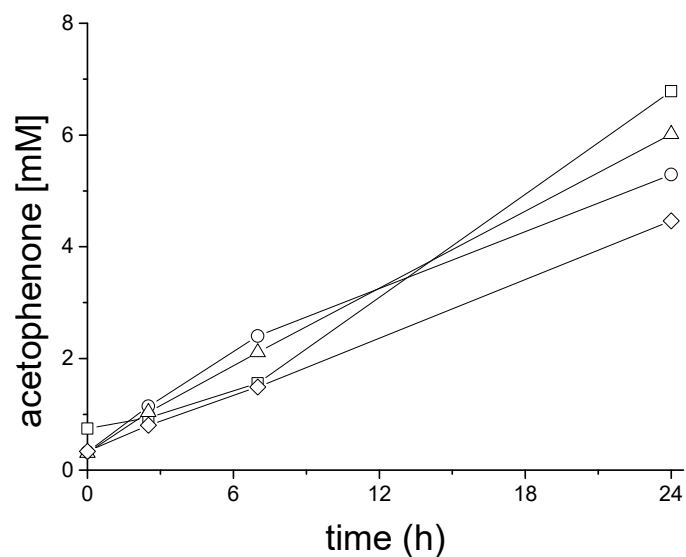

**Figure S22:** Effect of the pH on the photocatalytic activity of g-C<sub>3</sub>N<sub>4</sub>. pH 8.5 (O), pH 9.2 (Δ) pH 10.2 mM (◇) and MilliQ water (□). were examined. Reaction conditions: MilliQ: 1 ml MilliQ water with [1-phenylethanol] = 25 mM and [g-C<sub>3</sub>N<sub>4</sub>] = 10 mg/ml. Varied pH: 1 ml reaction mixture containing [NaPI] = 100 mM, [isopropylamine] = 1 M, [1-phenylethanol] = 25 mM and [g-C<sub>3</sub>N<sub>4</sub>] = 10 mg/ml. Reactions were run at 30 °C and stirred with a magnetic stirrer.

## Reductive amination

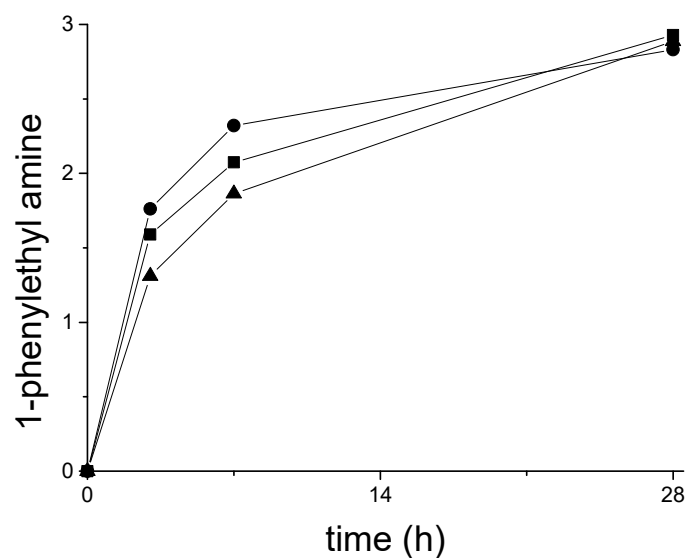

**Figure S23:** Effect of the enzyme concentration on the yield of the reductive amination: 5 mg/ml (●) 10 mg/ml (■) 15 mg/ml (▲) ATωTA concentrations were examined. Reaction conditions: 1 ml pH 9.1 reaction mixture containing [NaPI] = 100 mM [isopropylamine] = 1 M, [acetophenone] = 4.5 mM and [PLP] = 1 mM. Samples were incubated at 30 °C and shaken on a shaking plate.

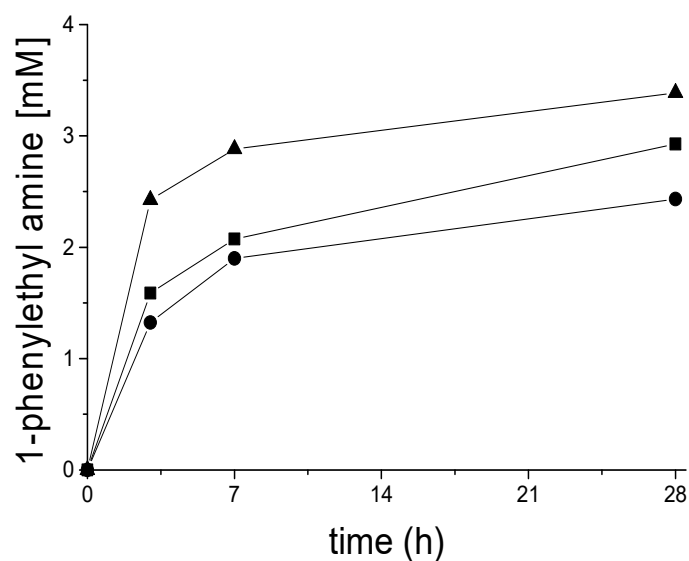

**Figure S24:** Effect of the amine donor concentration on the conversion of the reductive amination. 0.5 M (●) 1 M (■) and 2 M (▲) isopropylamine concentrations were examined. Reaction conditions: 1 ml pH 9 reaction mixture containing [NaPI] = 100 mM, [acetophenone] = 4.5 mM, [ATωTA] = 10 mg/ml and [PLP] = 1 mM. Samples were incubated at 30 °C and shaken on a shaking plate.

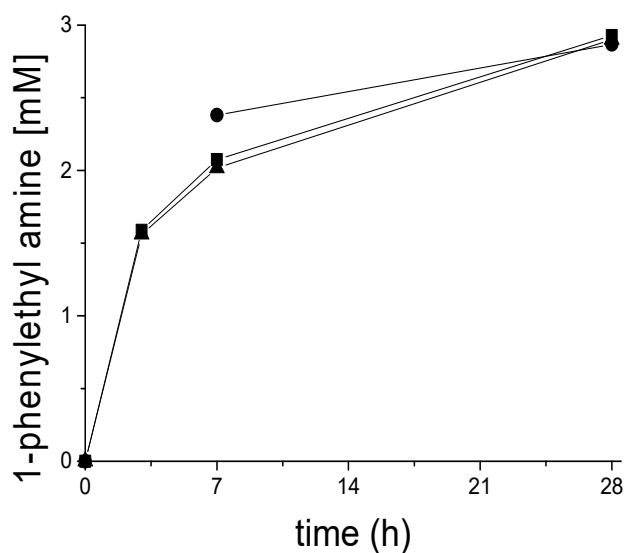

**Figure S25:** Effect of the cofactor concentration on the yield of the reductive amination. 0.5 mM (●) 1 mM (■) and 2 mM (▲) PLP concentrations were examined. Reaction conditions: 1 ml pH 9 reaction mixture containing [NaPI] = 100 mM, [isopropylamine] = 1 M, [acetophenone] = 4.5 mM and [ATωTA] = 10 mg/ml. Samples were incubated at 30 °C and shaken on a shaking plate.

## pH dependency of the used $\omega$ -transaminases

### From *aspergillus terreus* ( $AT\omega TA$ )

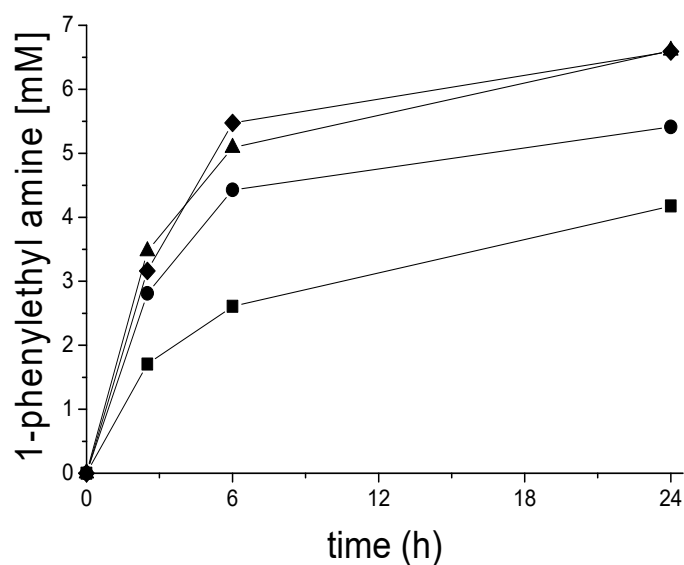

**Figure S26:** pH dependency of  $AT\omega TA$ . pH 8 (■), pH 8.5 (●) pH 9.2 (▲) and pH 10.2 (◆) were examined.

Reaction conditions: 1 ml reaction mixture containing [NaPI] = 100 mM, [acetophenone] = 4.5 mM, [isopropylamine] = 1M, [ $AT\omega TA$ ] = 10 mg/ml and [PLP] = 1 mM. Samples were incubated at 30 °C and shaken on a shaking plate.

### From *Bacillus megaterium* ( $BM\omega TA$ )

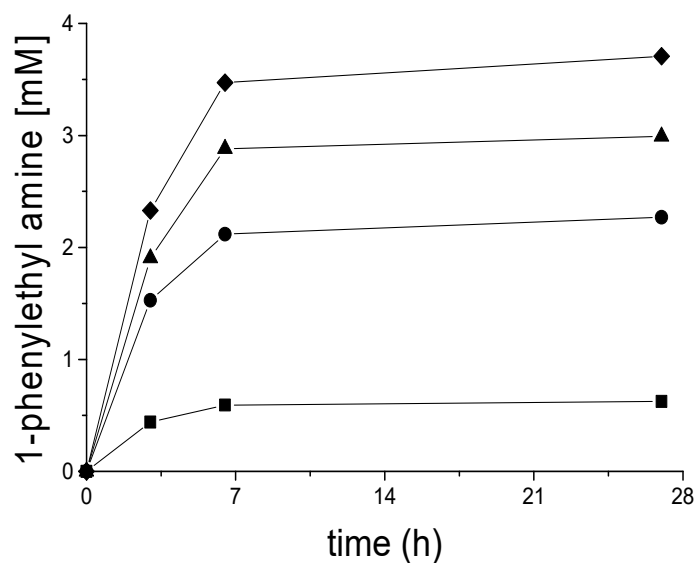

**Figure S27:** pH dependency of  $BM\omega TA$ . pH 7 (■), pH 8 (●) pH 8.5 (▲) and pH 9.1 (◆) were examined. Reaction conditions: 1 ml reaction mixture containing [NaPI] = 100 mM, [acetophenone] = 4.5 mM,

[isopropylamine] = 1M, [*BM* $\omega$ TA] = 10 mg/ml and [PLP] = 1 mM. Samples were incubated at 30 °C and shaken on a shaking plate.

### From *Vibrio fluvialis* (VF $\omega$ TA)

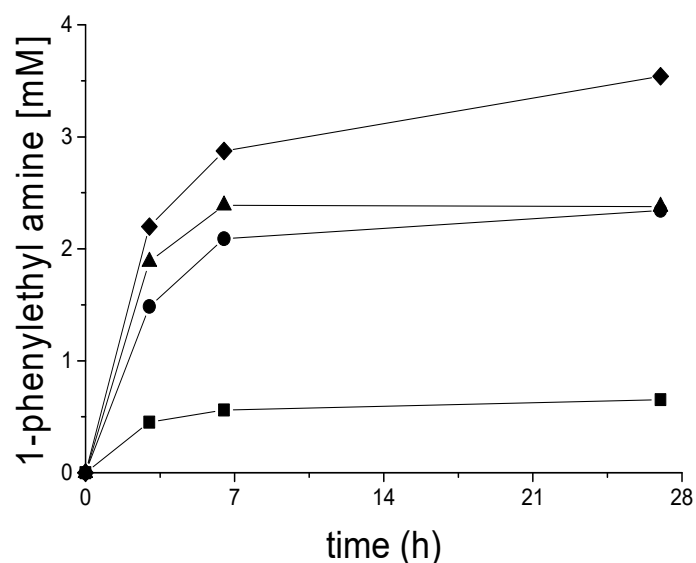

**Figure S28:** pH dependency of VF $\omega$ TA. pH 8 (■), pH 8.5 (●) pH 9.2 (▲) and pH 10.2 (◆) were examined.

Reaction conditions: 1 ml reaction mixture containing [NaPI] = 100 mM, [acetophenone] = 4.5 mM, [isopropylamine] = 1M, [VF $\omega$ TA] = 10 mg/ml and [PLP] = 1 mM. Samples were incubated at 30 °C and shaken on a shaking plate.

### From *Pseudomonas fluorescens* (PF $\omega$ TA)

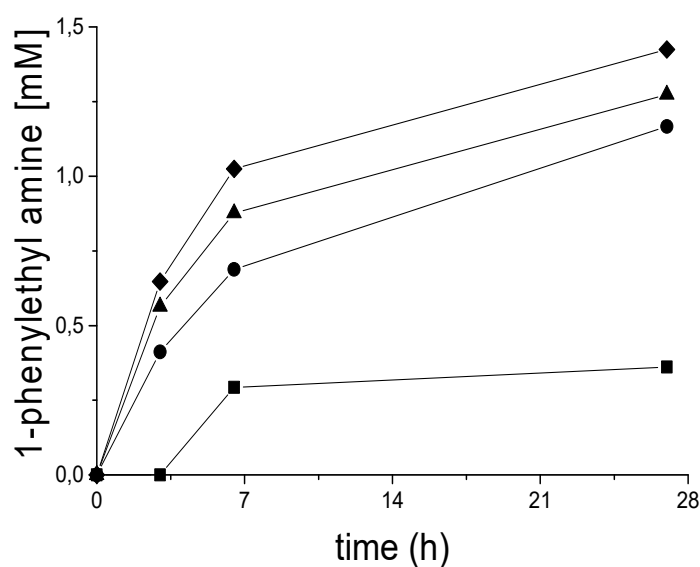

**Figure S29:** pH dependency of PF $\omega$ TA. pH 7 (■), pH 8 (●) pH 8.5 (▲) and pH 9 (◆) were examined.

Reaction conditions: 1 ml reaction mixture containing [NaPI] = 100 mM, [acetophenone] = 4.5 mM, [isopropylamine] = 1 M, [PF $\omega$ TA] = 10 mg/ml and [PLP] = 1 mM. Samples were incubated at 30 °C and shaken on a shaking plate.

## From *Chromobacterium violaceum* (CV $\omega$ TA)

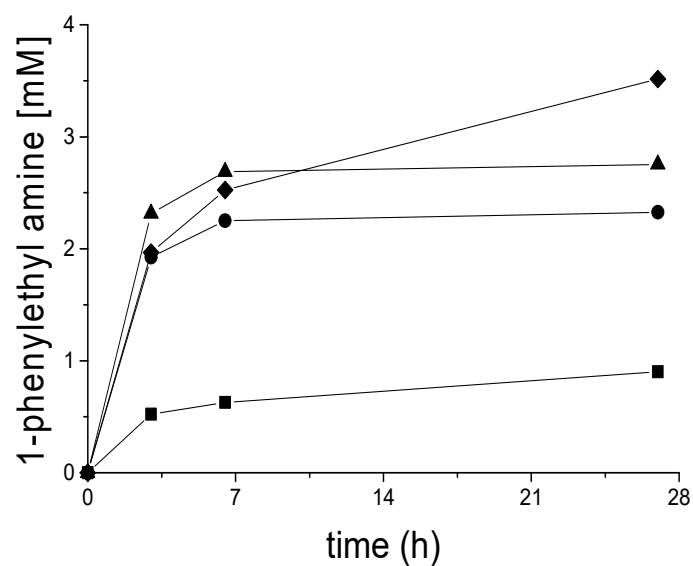

**Figure S30:** pH dependency of CV $\omega$ TA. pH 7 (■), pH 8 (●) pH 8.5 (▲) and pH 9 (◆) were examined. Reaction conditions: 1 ml reaction mixture containing [NaPI] = 100 mM, [acetophenone] = 4.5 mM, [isopropylamine] = 1M, [CV $\omega$ TA] = 10 mg/ml and [PLP] = 1 mM. Samples were incubated at 30 °C and shaken on a shaking plate

## Analytics

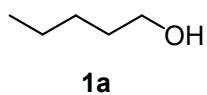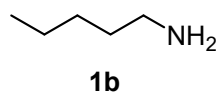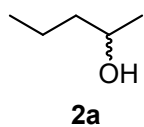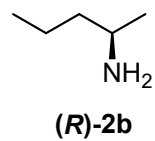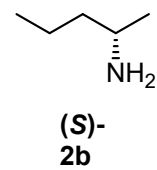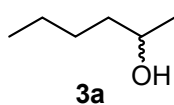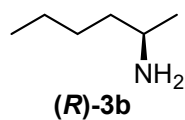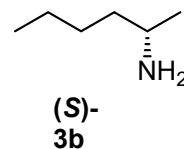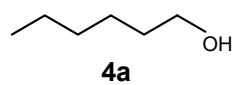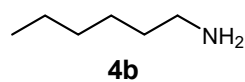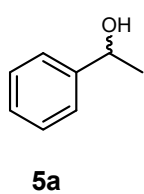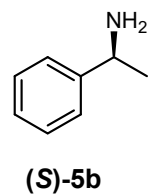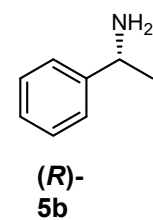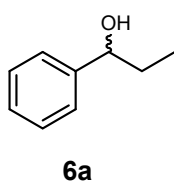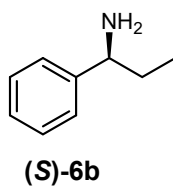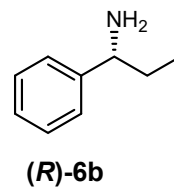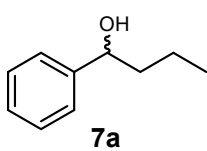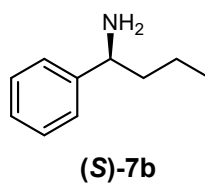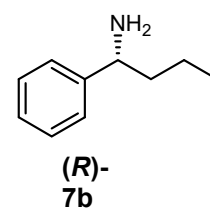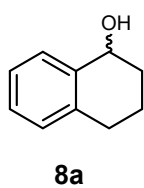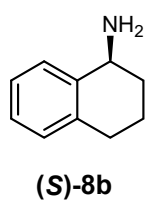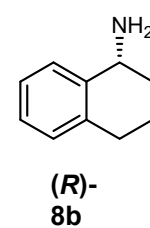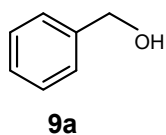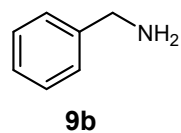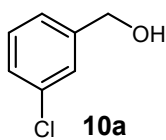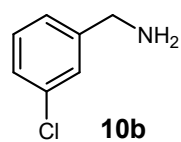

## Conversion determination of the alcohol oxidation

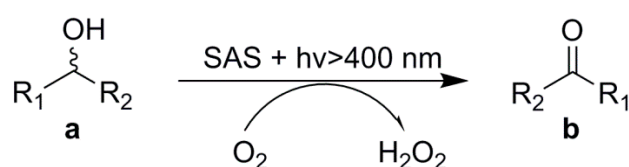

**Table S2:** Details of GC analysis of the alcohol oxidation.

| Substrate | Used GC system | Retention time [min] | Temperature profile                                                                                                       |
|-----------|----------------|----------------------|---------------------------------------------------------------------------------------------------------------------------|
| <b>1a</b> | System 1       | n-pentanol 6.39      | 100 °C hold 4 min, 25 °C /min to 135 °C hold 1.5 min, 30 °C /min to 245 °C hold 2 min.                                    |
|           |                | pentanal 3.22        |                                                                                                                           |
|           |                | dodecane 5.62        |                                                                                                                           |
| <b>2a</b> | System 1       | 2-pentanol 4.65      | 100 °C hold 5 min, 25 °C /min to 110 °C hold 1.5 min, 30 °C /min to 245 °C hold 2 min.                                    |
|           |                | 2-pentanone 3.19     |                                                                                                                           |
|           |                | dodecane 6.20        |                                                                                                                           |
| <b>3a</b> | System 1       | n-hexanol 6.03       | 110 °C hold 2.5 min, 20 °C /min to 120 °C hold 1.5 min, 30 °C /min to 150 °C hold 1 min, 30 °C /min to 245 °C hold 2 min. |
|           |                | hexanal 3.11         |                                                                                                                           |
|           |                | dodecane 4.03        |                                                                                                                           |

|     |          |                                                                                       |                                                                                                                                                                       |
|-----|----------|---------------------------------------------------------------------------------------|-----------------------------------------------------------------------------------------------------------------------------------------------------------------------|
| 4a  | System 1 | 2-hexanol 5.16<br>2-hexanone 3.72<br>dodecane 4.88                                    | 110 °C hold 3 min, 15 °C /min<br>to 120 °C hold 2 min, 30 °C<br>/min to 240 °C hold 2 min.                                                                            |
| 5a  | System 1 | 1-phenylethanol 8.98<br>acetophenone 7.49<br>1-octanol 6.00                           | 130 °C hold 3 min, 30 °C /min<br>to 200 °C hold 3.9 min, 30 °C<br>/min to 240 °C hold 1 min.                                                                          |
| 6a  | System 1 | 1-phenylpropanol 10.12<br>propiophenone 8.91<br>dodecane 3.55                         | 150 °C hold 3 min, 25 °C /min<br>to 160 °C hold 1 min, 25 °C<br>/min to 235 °C hold 3 min.                                                                            |
| 7a  | System 1 | 1-phenylbutanol 11.16<br>butyrophenone 9.63<br>dodecane 3.55                          | 150 °C hold 3 min, 25 °C /min<br>to 160 °C hold 1 min, 25 °C<br>/min to 235 °C hold 4 min, 30<br>°C /min to 245 °C hold 2 min.                                        |
| 8a  | System 1 | 1,2,3,4-tetrahydro-1-<br>naphthol 16.36<br>$\alpha$ -Tetralone 15.06<br>Dodecane 3.55 | 150 °C hold 3 min, 25 °C /min<br>to 160 °C hold 1 min, 15 °C<br>/min to 240 °C hold 8 min, 30<br>°C /min to 250°C hold 2 min.                                         |
| 9a  | System 1 | Benzyl alcohol 8.37<br>Benzaldehyde 5.62<br>1-octanol 5.24                            | 150 °C hold 2.2 min, 25 °C<br>/min to 210 °C hold 1.2 min, 25<br>°C /min to 230 °C hold 2.3 min,<br>25 °C /min to 240 °C hold 0.8<br>min.                             |
| 10a | System 1 | 3-chlorobenzyl alcohol<br>14.53<br>3-chlorobenzaldehyde<br>8.97<br>dodecane 2.78      | 150 °C hold 3 min, 25 °C /min<br>to 160 °C hold 1 min, 15 °C<br>/min to 225 °C hold 1 min, 25<br>°C /min to 240 °C hold 5 min,<br>25 °C /min to 245 °C hold 1<br>min. |

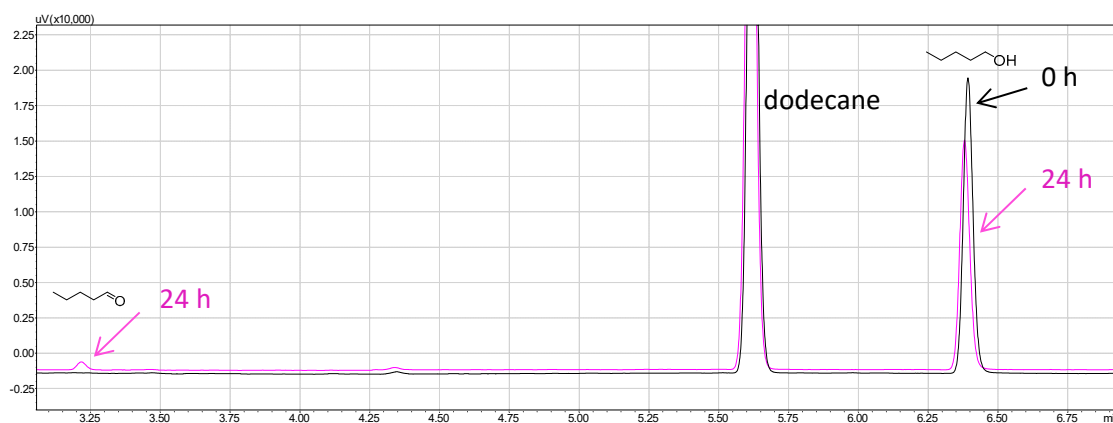

**Figure S31:** Representative GC chromatogram of SAS catalyzed photooxidation of 1-pentanol. Samples were diluted two times with ethyl acetate.

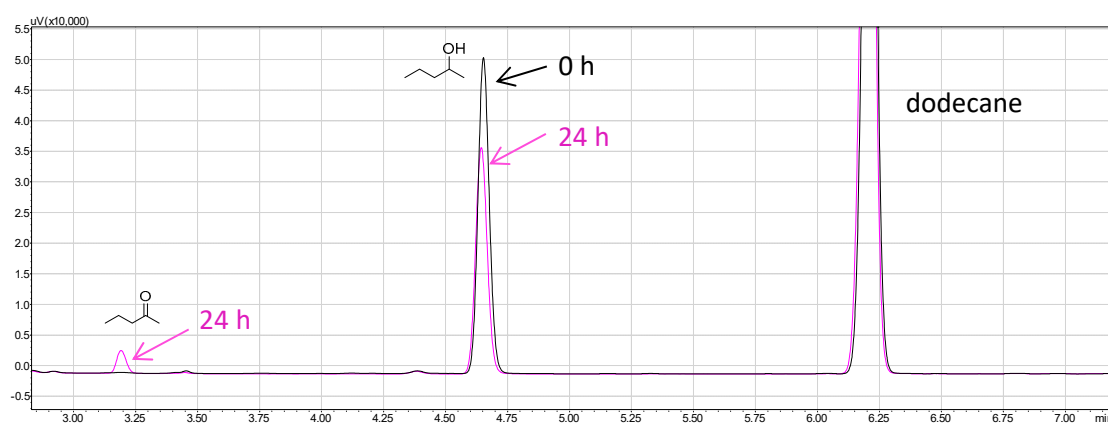

**Figure S32:** Representative GC chromatogram of SAS catalyzed photooxidation of 2-pentanol. Samples were diluted two times with ethyl acetate.

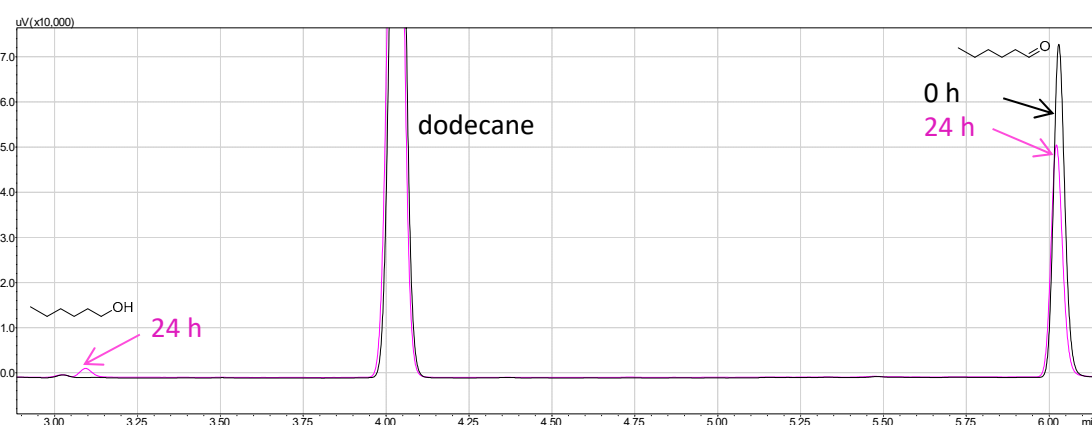

**Figure S33:** Representative GC chromatogram of SAS catalyzed photooxidation of 1-hexanol. Samples were diluted two times with ethyl acetate.

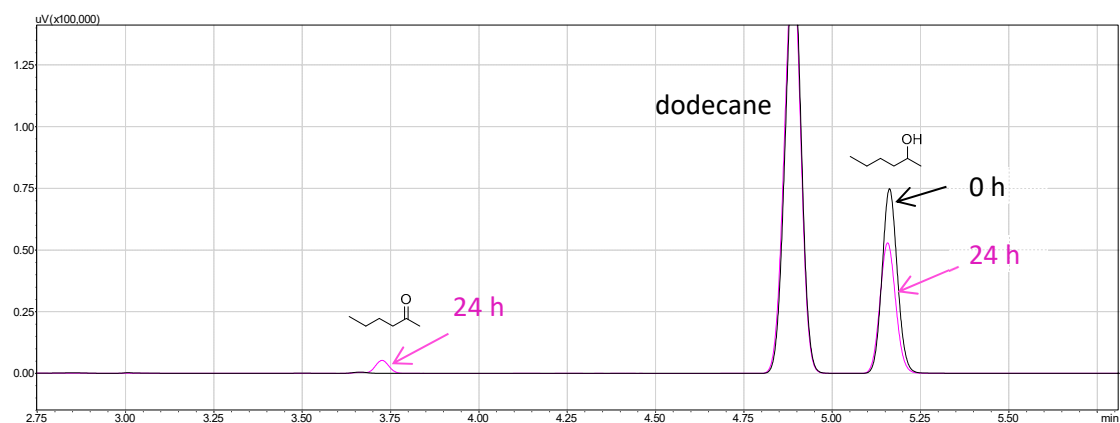

**Figure S34:** Representative GC chromatogram of SAS catalyzed photooxidation of 2-hexanol. Samples were diluted two times with ethyl acetate.

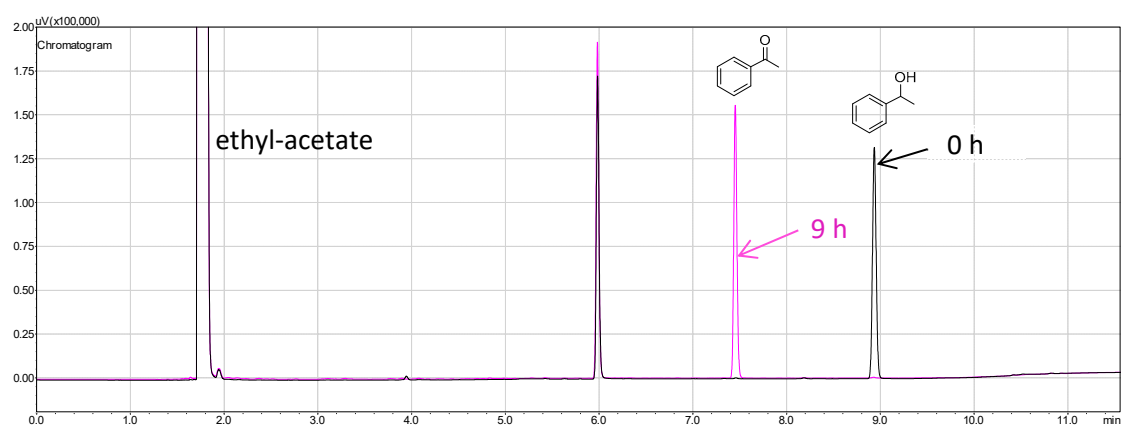

**Figure S35:** Representative GC chromatogram of SAS catalyzed photooxidation of 1-phenylethanol. Samples were diluted two times with ethyl acetate.

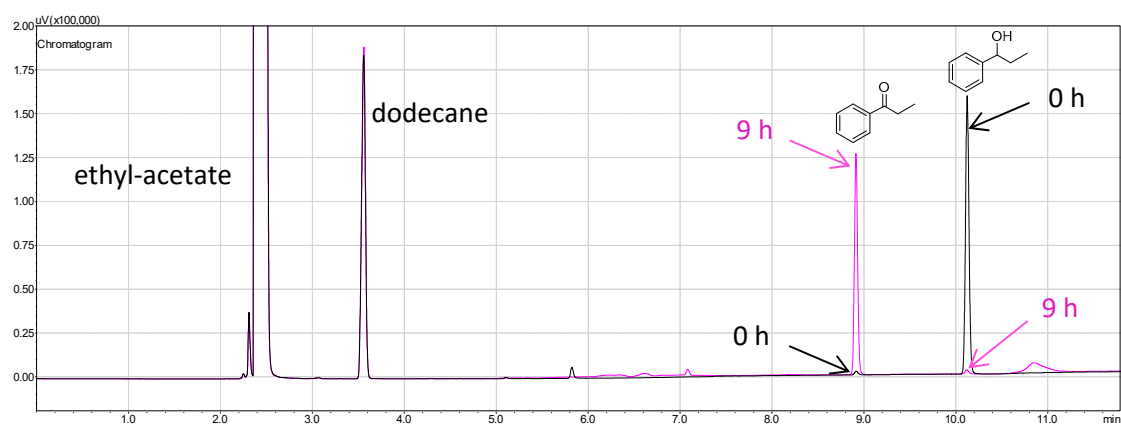

**Figure S36:** Representative GC chromatogram of SAS catalyzed photooxidation of 1-phenylpropanol. Samples were diluted two times with ethyl acetate.

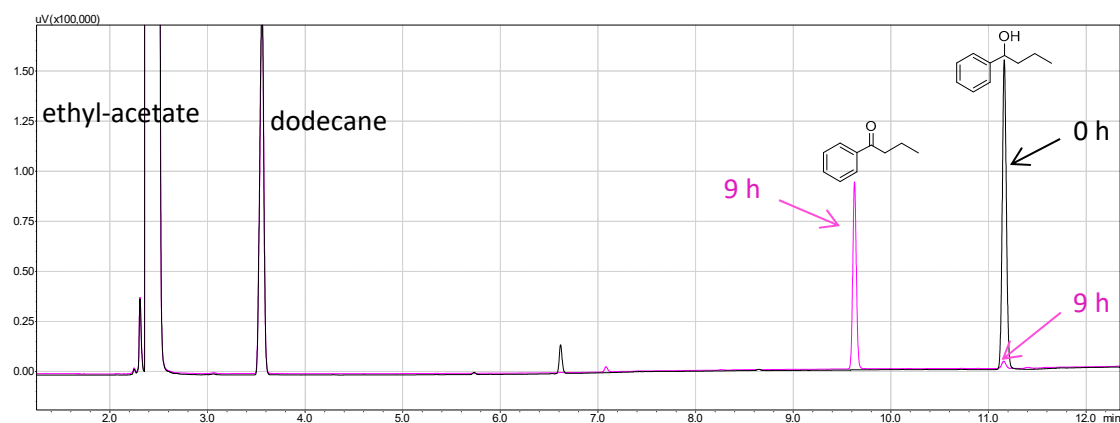

**Figure S37:** Representative GC chromatogram of SAS catalyzed photooxidation of 1-phenylbutanol. Samples were diluted two times with ethyl acetate.

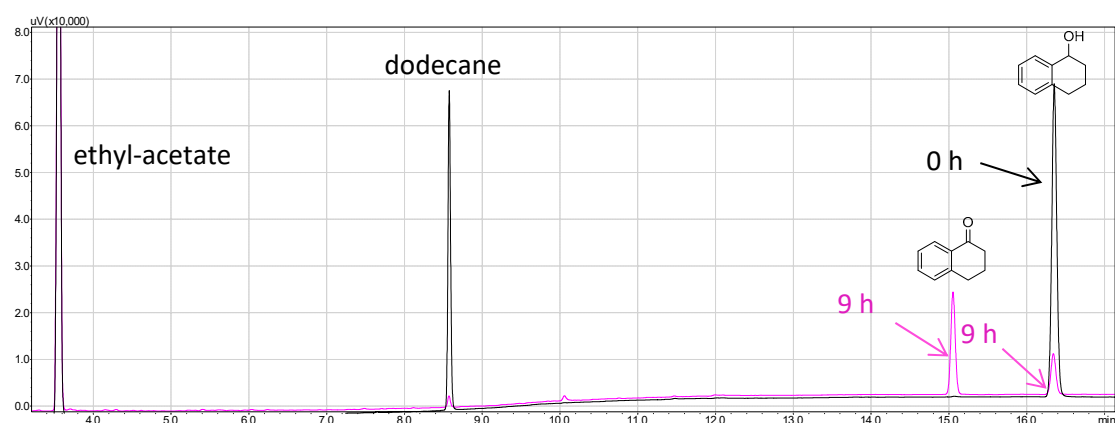

**Figure S38:** Representative GC chromatogram of SAS catalyzed photooxidation of 1,2,3,4-tetrahydro-1-naphthol. Samples were diluted two times with ethyl acetate.

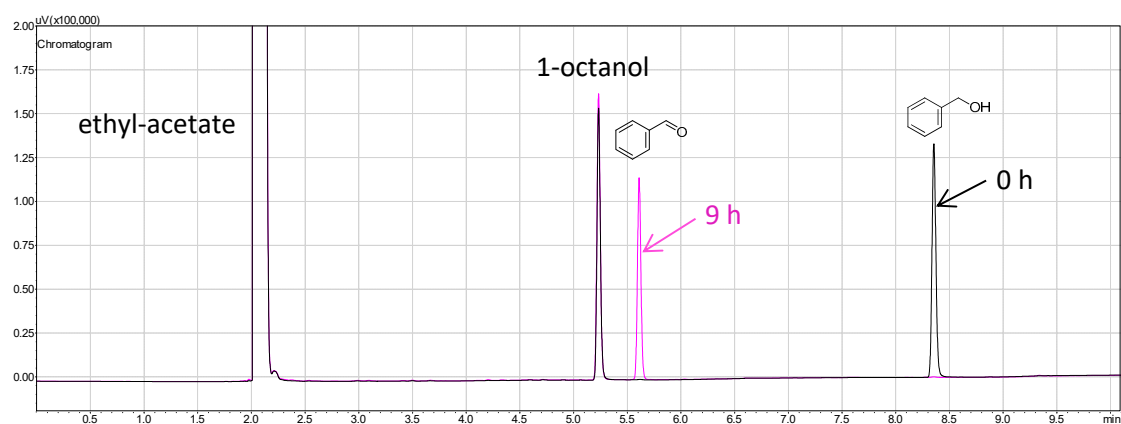

**Figure S39:** Representative GC chromatogram of SAS catalyzed photooxidation of benzyl alcohol. Samples were diluted two times with ethyl acetate.

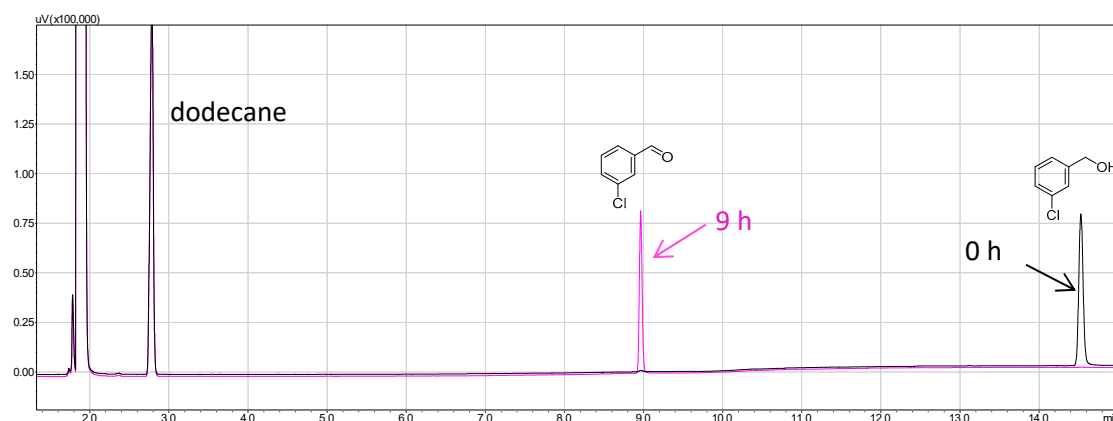

**Figure S40:** Representative GC chromatogram of SAS catalyzed photooxidation of 3-chlorobenzyl alcohol. Samples were diluted two times with ethyl acetate.

## Conversion and enantiomeric excess determination of the reductive amination

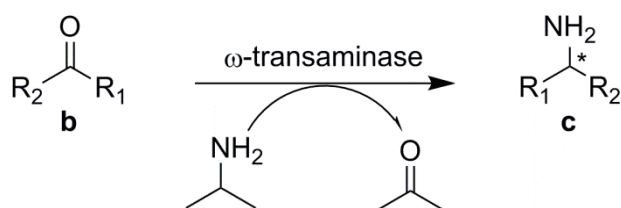

**Table S3:** Details of GC analysis of the reductive amination.

| Substrate | Used GC system | Retention time [min] | Temperature profile                                                                                                                                     |
|-----------|----------------|----------------------|---------------------------------------------------------------------------------------------------------------------------------------------------------|
| <b>1b</b> | System 2       | n-pentylamine 13.71  | 110 °C hold 3.5 min, 20 °C /min to 115 °C hold 2 min, 20 °C /min to 140 °C hold 2 min, 20 °C /min to 215 °C hold 1 min, 25 °C /min to 235 °C hold 1 min |
|           |                | dodecane 7.85        |                                                                                                                                                         |

|           |          |                                         |                                                                                                                                                                                        |
|-----------|----------|-----------------------------------------|----------------------------------------------------------------------------------------------------------------------------------------------------------------------------------------|
| <b>2b</b> | System 3 | 2-pentanone 4.00                        | 80 °C hold 5 min, 25 °C /min to 150 °C hold 1.5 min, 25 °C /min to 175 °C hold 1 min, 25 °C /min to 215 °C hold 1 min.                                                                 |
|           |          | ( <i>S</i> )- 2-aminopentane 10.77      |                                                                                                                                                                                        |
|           |          | ( <i>R</i> )- 2-aminopentane 10.93      |                                                                                                                                                                                        |
|           |          | dodecane 8.86                           |                                                                                                                                                                                        |
| <b>3b</b> | System 4 | hexanal 8.91                            | 90 °C hold 3 min, 30 °C /min to 105 °C hold 1 min, 30 °C /min to 140 °C hold 2 min, 30 °C /min to 150 °C hold 2 min, 30 °C /min to 265 °C hold 2 min, 30 °C /min to 325 °C hold 2 min. |
|           |          | 1-aminohexane 7.33                      |                                                                                                                                                                                        |
|           |          | dodecane 6.40                           |                                                                                                                                                                                        |
|           |          |                                         |                                                                                                                                                                                        |
| <b>4b</b> | System 5 | 2-hexanone 3.20                         | 90 °C hold 3 min, 20 °C /min to 100 °C hold 2 min, 20 °C /min to 150 °C hold 2 min, 25 °C /min to 225 °C hold 2 min.                                                                   |
|           |          | ( <i>S</i> )- 2-aminohexane 9.20        |                                                                                                                                                                                        |
|           |          | dodecane 8.54                           |                                                                                                                                                                                        |
|           |          |                                         |                                                                                                                                                                                        |
| <b>5b</b> | System 2 | acetophenone 6.76                       | 130 °C hold 3 min, 10 °C /min to 140 °C hold 4.5 min, 15 °C /min to 210 °C hold 5 min, 25 °C /min to 235 °C hold 2 min.                                                                |
|           |          | ( <i>R</i> )- 1-phenylethyl amine 16.14 |                                                                                                                                                                                        |
|           |          | ( <i>S</i> )- 1-phenylethyl amine 16.29 |                                                                                                                                                                                        |
|           |          | dodecane 5.42                           |                                                                                                                                                                                        |
| <b>6b</b> | System 5 | propiophenone 4.82                      | 130 °C hold 3 min, 15 °C /min to 140 °C hold 2 min, 20 °C /min to 190 °C hold 2 min, 25 °C /min to 225 °C hold 3 min.                                                                  |
|           |          | ( <i>S</i> )- 1-phenylpropyl amine 9.50 |                                                                                                                                                                                        |
|           |          | ( <i>R</i> )- 1-phenylpropyl amine 9.62 |                                                                                                                                                                                        |
|           |          | dodecane 4.10                           |                                                                                                                                                                                        |
| <b>7b</b> | System 5 | butyrophenone 9.63                      | 130 °C hold 3 min, 25 °C /min to 140 °C hold 1 min, 15 °C /min to 155 °C hold 2 min, 25 °C /min to 200 °C hold 4.5 min, 25 °C /min to 215 °C hold 1 min.                               |
|           |          | ( <i>S</i> )- 1-phenylbutyl amine 9.50  |                                                                                                                                                                                        |
|           |          | ( <i>R</i> )- 1-phenylbutyl amine 9.62  |                                                                                                                                                                                        |
|           |          | dodecane 3.55                           |                                                                                                                                                                                        |
| <b>8b</b> | System 5 | $\alpha$ -Tetralone 8.17                | 120 °C hold 3 min, 20 °C /min to 150 °C hold 1 min, 20 °C /min to                                                                                                                      |

|     |          |                                               |                                                                                                                                                                                         |
|-----|----------|-----------------------------------------------|-----------------------------------------------------------------------------------------------------------------------------------------------------------------------------------------|
|     |          | (S)- 1,2,3,4-Tetrahydro-1-naphthylamine 12.29 | 180 °C hold 2 min, 20 °C /min to 220 °C hold 1.75 min 25 °C /min to 225 °C hold 3 min.                                                                                                  |
|     |          | (R)- 1,2,3,4-Tetrahydro-1-naphthylamine 12.49 |                                                                                                                                                                                         |
|     |          | Dodecane 4.75                                 |                                                                                                                                                                                         |
| 9b  | System 4 | Benzaldehyde 1.91                             | 120 °C hold 5 min, 20 °C /min to 170 °C hold 2 min, 20 °C /min to 200 °C hold 1 min, 30 °C /min to 305 °C hold 1 min.                                                                   |
|     |          | Benzyl amine 7.99                             |                                                                                                                                                                                         |
|     |          | dodecane 4.42                                 |                                                                                                                                                                                         |
| 10b | System 4 | 3-chlorobenzaldehyde 4.56                     | 100 °C hold 3 min, 30 °C /min to 130 °C hold 3 min, 30 °C /min to 155 °C hold 1 min, 30 °C /min to 215 °C hold 1 min, 30 °C /min to 270 °C hold 1 min, 30 °C /min to 325 °C hold 2 min, |
|     |          | 3-chlorobenzyl amine 11.00                    |                                                                                                                                                                                         |
|     |          | dodecane 5.49                                 |                                                                                                                                                                                         |

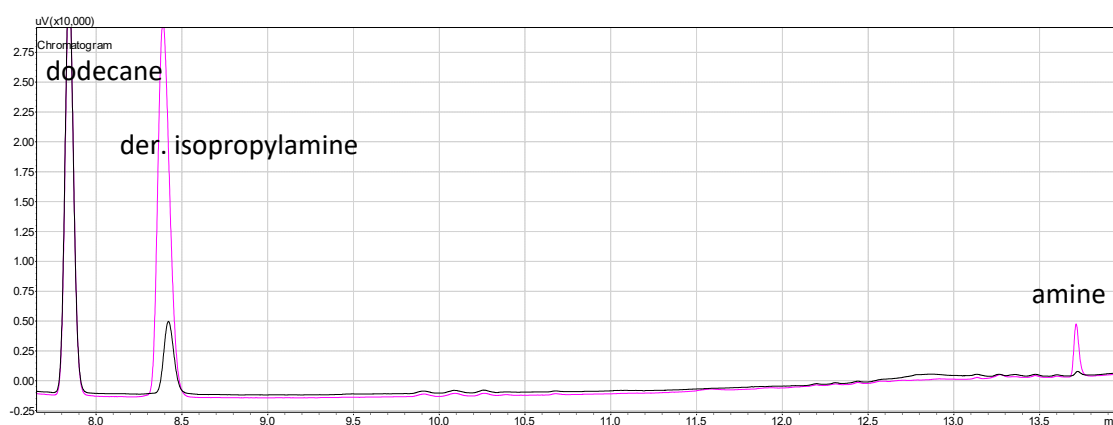

**Figure S41:** Representative GC chromatogram of derivatized n-pentylamine

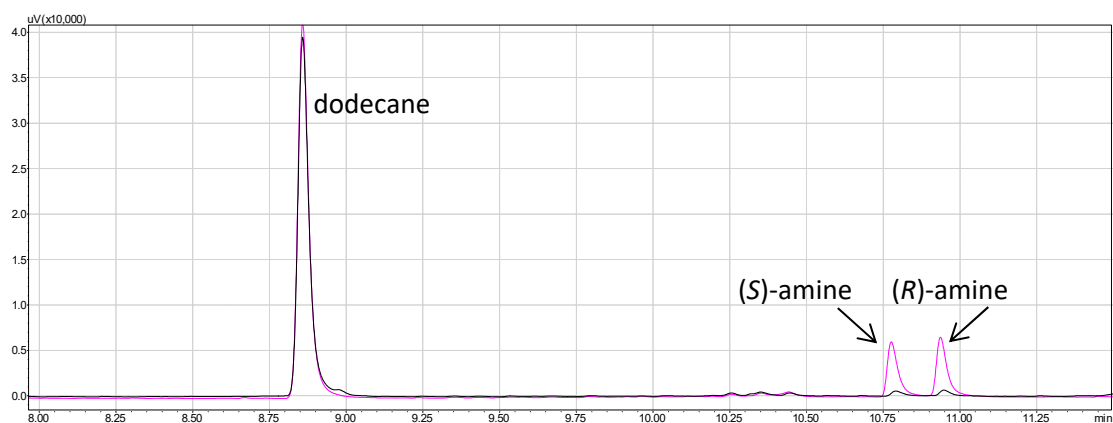

**Figure S42:** Representative GC chromatogram of derivatized 2-aminopentane.

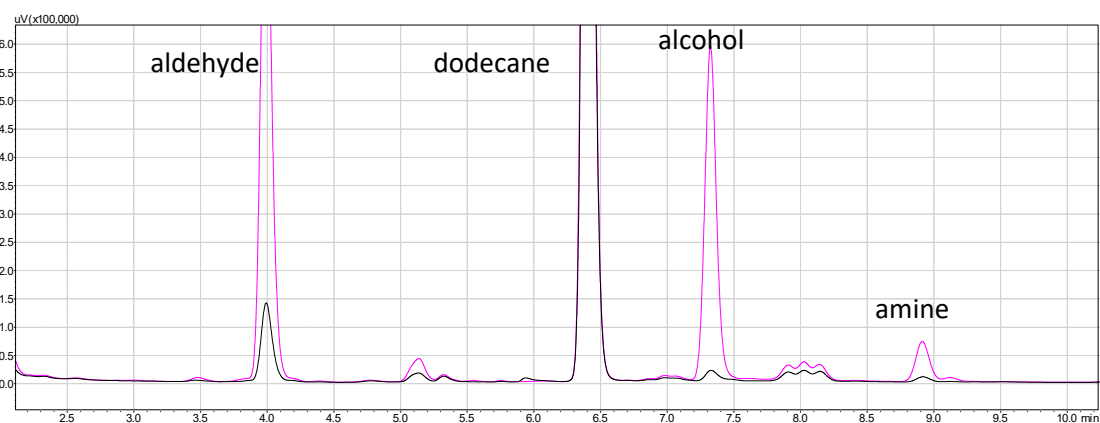

**Figure S43:** Representative GC chromatogram of derivatized 1-hexanol, hexanal and 1-hexylamine mixture.

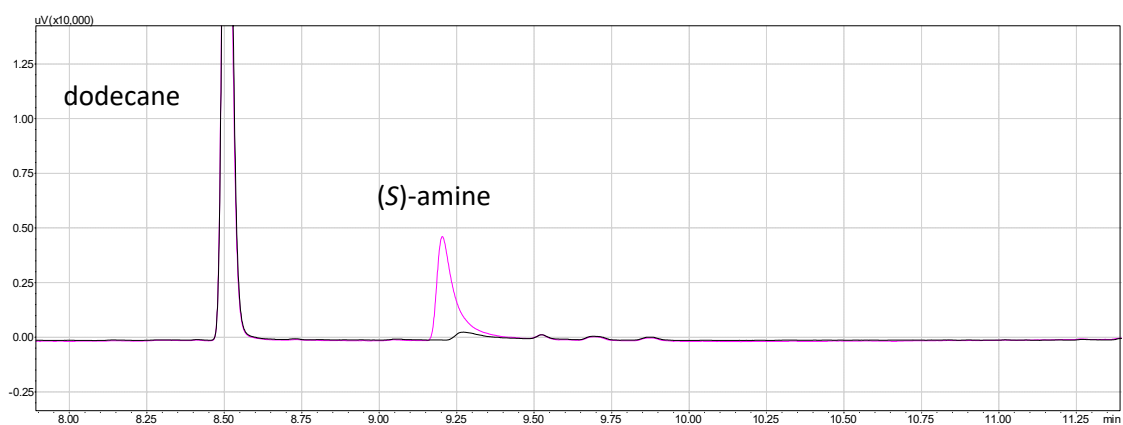

**Figure S44:** Representative GC chromatogram of derivatized 2-aminoheptane.

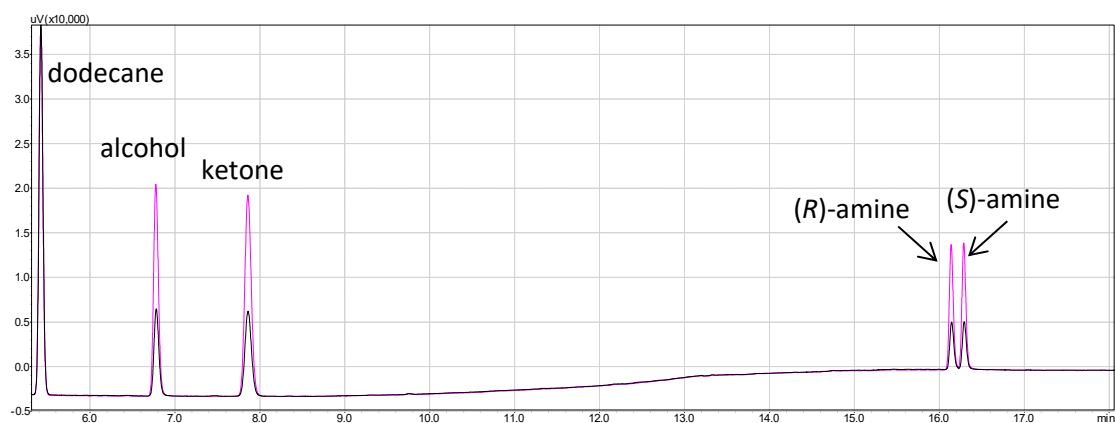

**Figure S45:** Representative GC chromatogram of derivatized 1-phenylethanol, acetophenone and 1-phenylethyl amine.

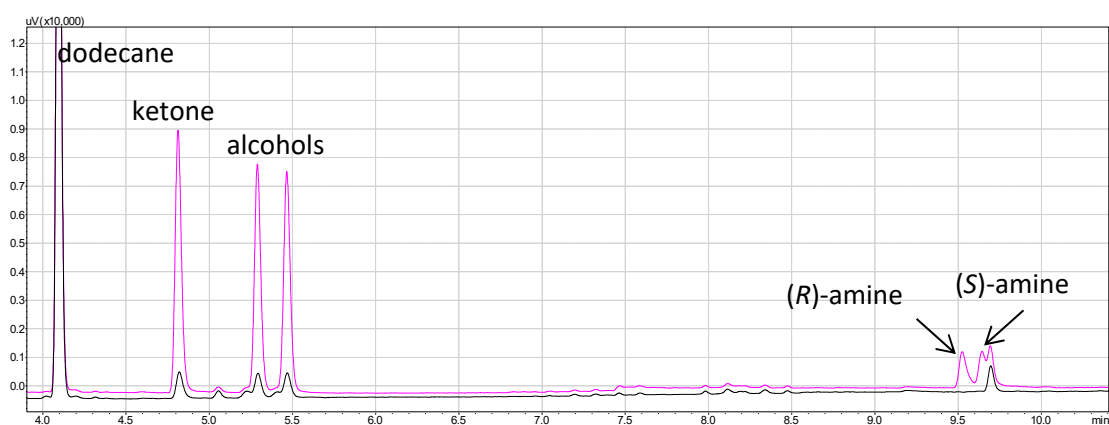

**Figure S46:** Representative GC chromatogram of derivatized 1-phenylpropanol, propiophenone (*R*) and (*S*) 1-phenylpropyl amine.

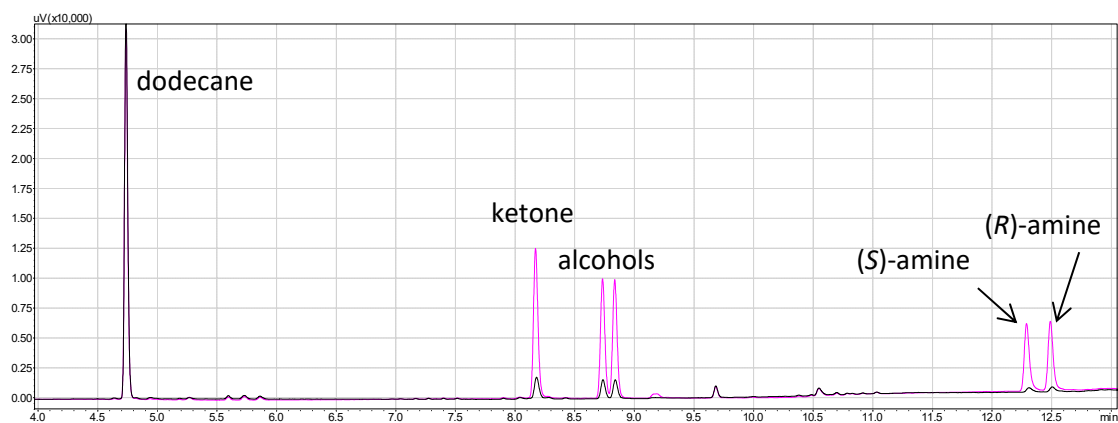

**Figure S47:** Representative GC chromatogram of derivatized 1,2,3,4-tetrahydro-1-naphthol,  $\alpha$ -tetralone, (*R*) and (*S*) 1,2,3,4-tetrahydro-1-naphthylamine.

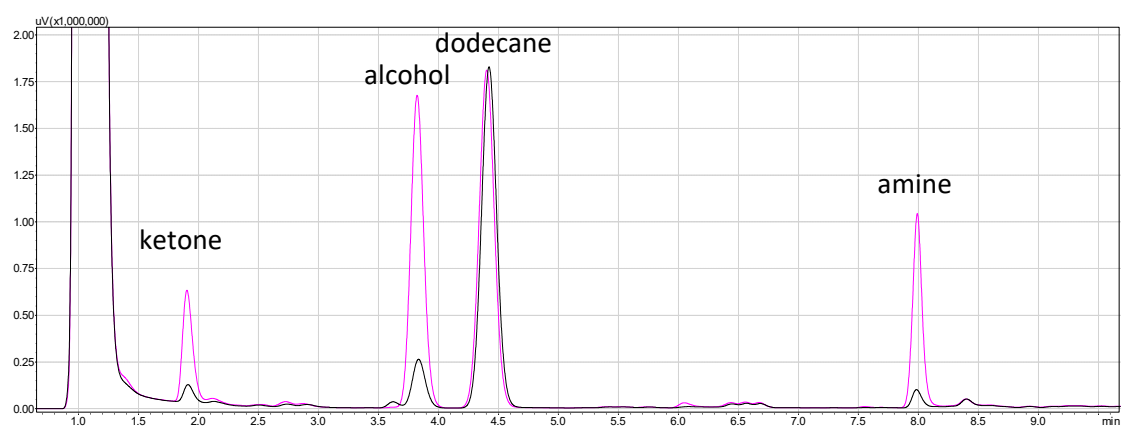

**Figure S48:** Representative GC chromatogram of derivatized benzyl alcohol, benzaldehyde, benzyl amine.

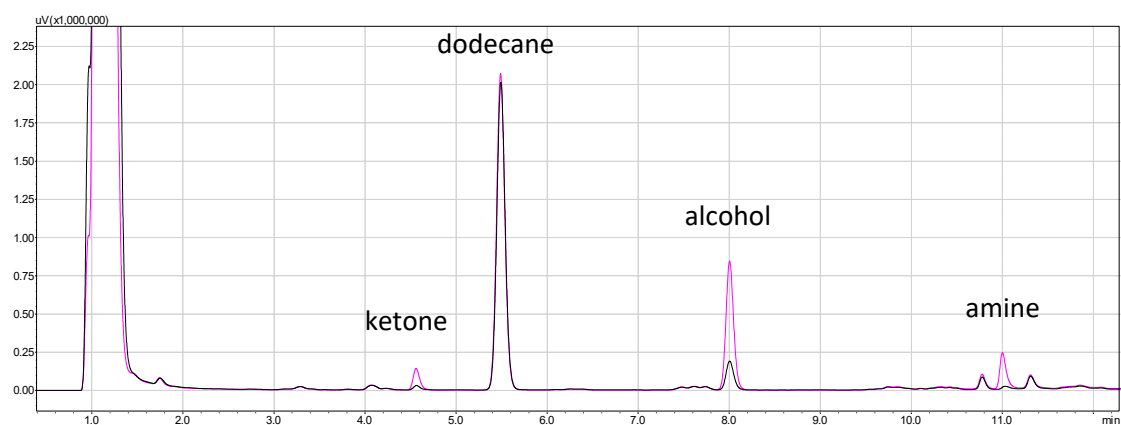

**Figure S49:** Representative GC chromatogram of derivatized 3-chlorobenzyl alcohol, 3-chlorobenzaldehyde, 3-chlorobenzyl amine.

## References

1. Xu, H.; Yan, J.; She, X.; Xu, L.; Xia, J.; Xu, Y.; Song, Y.; Huang, L.; Li, H. Graphene-analogue carbon nitride: Novel exfoliation synthesis and its application in photocatalysis and photoelectrochemical selective detection of trace amount of  $\text{Cu}^{2+}$ . *Nanoscale* **2014**, *6*, 1406-1415.
2. Zhang, W.; Bariotaki, A.; Smonou, I.; Hollmann, F. Visible-light-driven photooxidation of alcohols using surface-doped graphitic carbon nitride. *Green Chemistry* **2017**, *19*, 2096-2100.
3. Verma, S.; Baig, R.N.; Nadagouda, M.N.; Varma, R.S. Selective oxidation of alcohols using photoactive  $\text{VO@g-C}_3\text{N}_4$ . *ACS Sustainable Chemistry & Engineering* **2016**, *4*, 1094-1098.
